# Supplementary material for: Converting AgCl nanocubes to silver nanowires through a glycerol-mediated solution route
Source: Royal Society of Chemistry journal article supplement (doi:10.1039/c2ce25544h), 2012-01-01
Supplement: c2ce25544h.pdf [file c2ce25544h.pdf]

## Supplementary Information

# Converting AgCl Nanocubes to silver nanowires through a glycerol-mediated solution route

Changhua An,<sup>\*a</sup> Jizhuang Wang,<sup>a</sup> Shutao Wang,<sup>a</sup> Qinhui Zhang,<sup>b</sup> Min Yang,<sup>c</sup> and Jinhua Zhan<sup>\*c</sup>

<sup>a</sup> *State Key Laboratory of Heavy Oil Processing and Department of Materials Physics and Chemistry, Key Laboratory of New Energy Physics & Materials Science in Universities of Shandong, College of Science, China University of Petroleum, Qingdao, Shandong 266580, P. R. China. Fax: (+) 86-532-86981787; E-mail: [anchh@upc.edu.cn](mailto:anchh@upc.edu.cn)*

<sup>b</sup> *State Key Laboratory of Heavy Oil, College of Chemical Engineering, China University of Petroleum, Qingdao, 266580, P. R. China.*

<sup>c</sup> *College of Chemistry and Chemical Engineering, Shandong University, Jinan, Shandong 250100, P. R. China; Email: [jhzhan@sdu.edu.cn](mailto:jhzhan@sdu.edu.cn)*

## **1. Synthesis of irregular AgCl particles in water**

The irregular AgCl particles were prepared using a simple precipitation reaction between AgNO<sub>3</sub> and NaCl in water without any capping agent. Typically, 22 mg NaCl and 52 mg AgNO<sub>3</sub> were added directly to 15 mL of de-ionized water and precipitate of AgCl would happen immediately. The product was centrifuged at 8000 rpm for 2 min and then vacuum-dried at 50 °C for 5 h. The AgCl powders were dispersed in 15 mL glycerol by ultrasonication and 108 mg of PVP was then added. After the solution was kept at 60 °C for 10 min under magnetic stirring, the mixture was heated to 220 °C for 7 h to ensure complete conversion of the AgCl particles to silver.

## **2. Synthesis and reduction of AgBr**

The procedure of synthesis and reduction of AgBr is similar to that of AgCl. In a typical experiment, 15 mL of glycerol was placed in a flask with the capacity of 50 mL and heated to 60 °C under magnetic stirring at 350 rpm. Then PVP (108 mg) and NaBr (39 mg) were sequentially added. After the complete dissolution of both PVP and NaBr, a glycerol solution (1 mL) of AgNO<sub>3</sub> (52 mg) was rapidly injected. The solution was maintained at 60 °C for an additional 20 min, and then elevated to 80 °C and kept at that temperature for another 40 min, resulting in the formation of a dispersion containing AgBr nanoparticles. Finally, the temperature was further increased to 220 °C under magnetic stirring rate of 600 rpm. Aliquots of the solution (0.5 mL) was taken at different intervals using a micropipette and quickly injected into the de-ionized water. The products were centrifuged at 10000 rpm for 5 min, followed by washing with acetone and de-ionized water to remove excessive glycerol and PVP. The final product was dispersed in ethanol for further characterization.

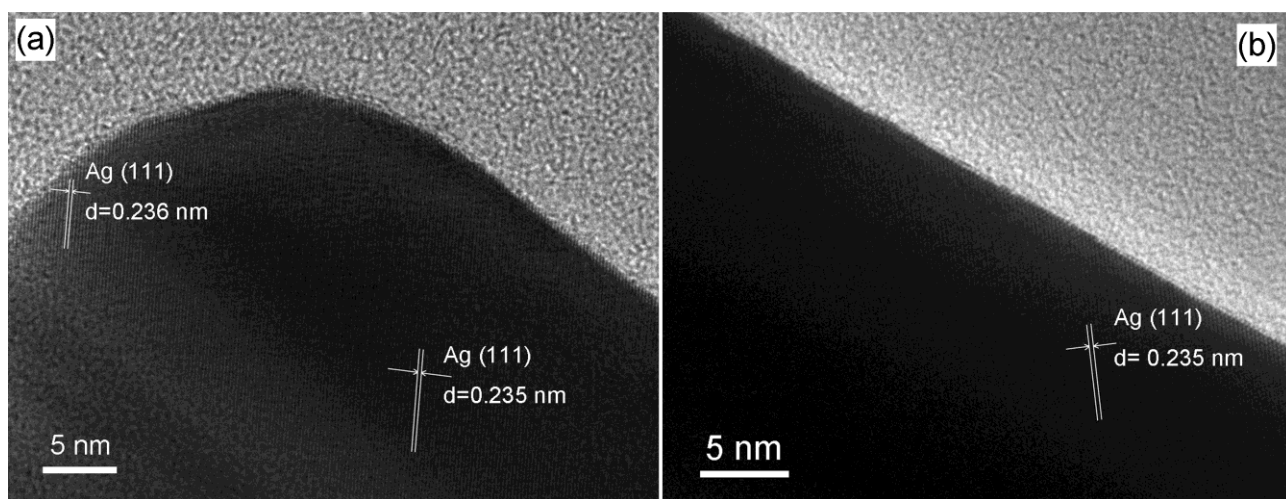

**Figure S1.** HRTEM images of the end part (a) and the central part of a single silver nanowire (b).

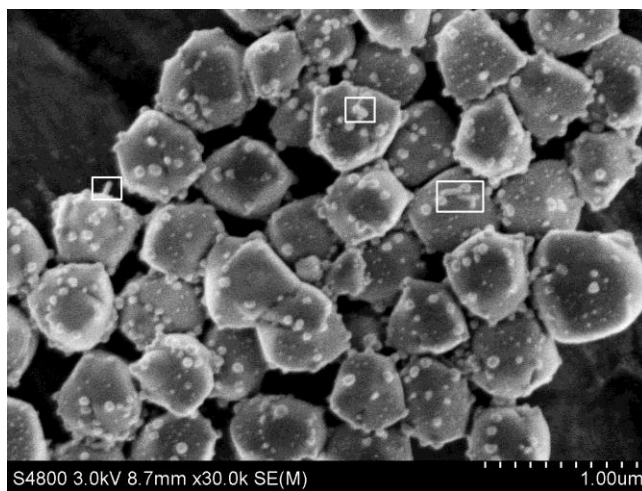

**Figure S2.** SEM images of the sample obtained at 15 min. As highlighted in square symbols, short nanorods have been produced at this stage.

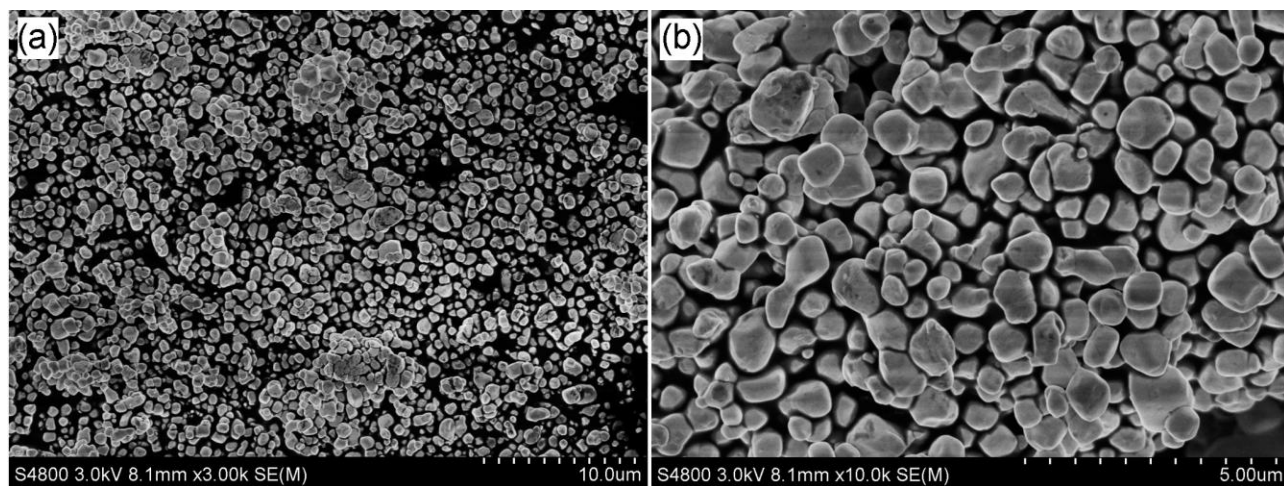

**Figure S3.** Low (a) and high-magnification (b) SEM images of AgCl particles synthesized in water.

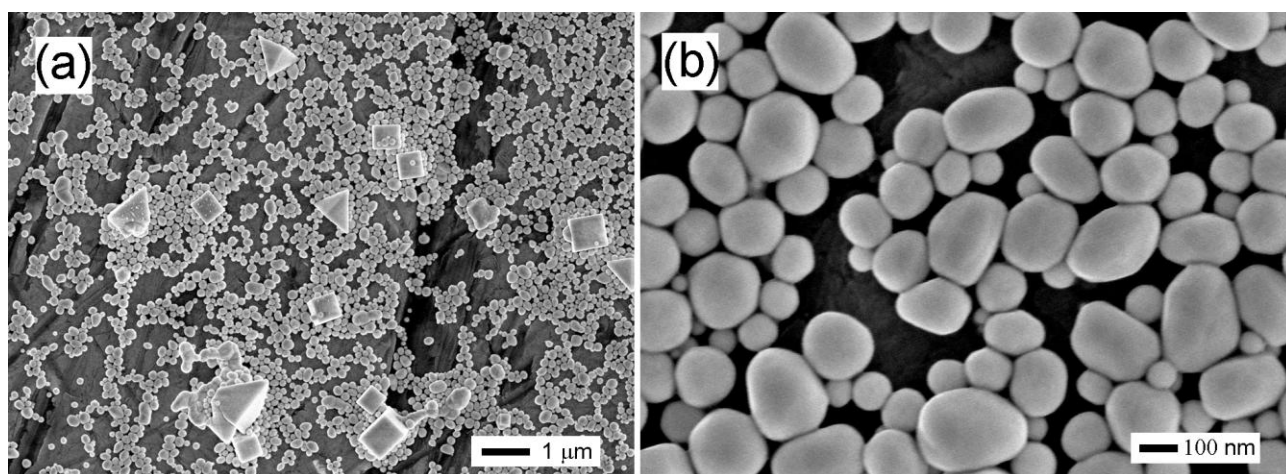

**Figure S4.** Low (a) and high-magnification (b) SEM images of Ag particles by reduction of AgCl formed in water.



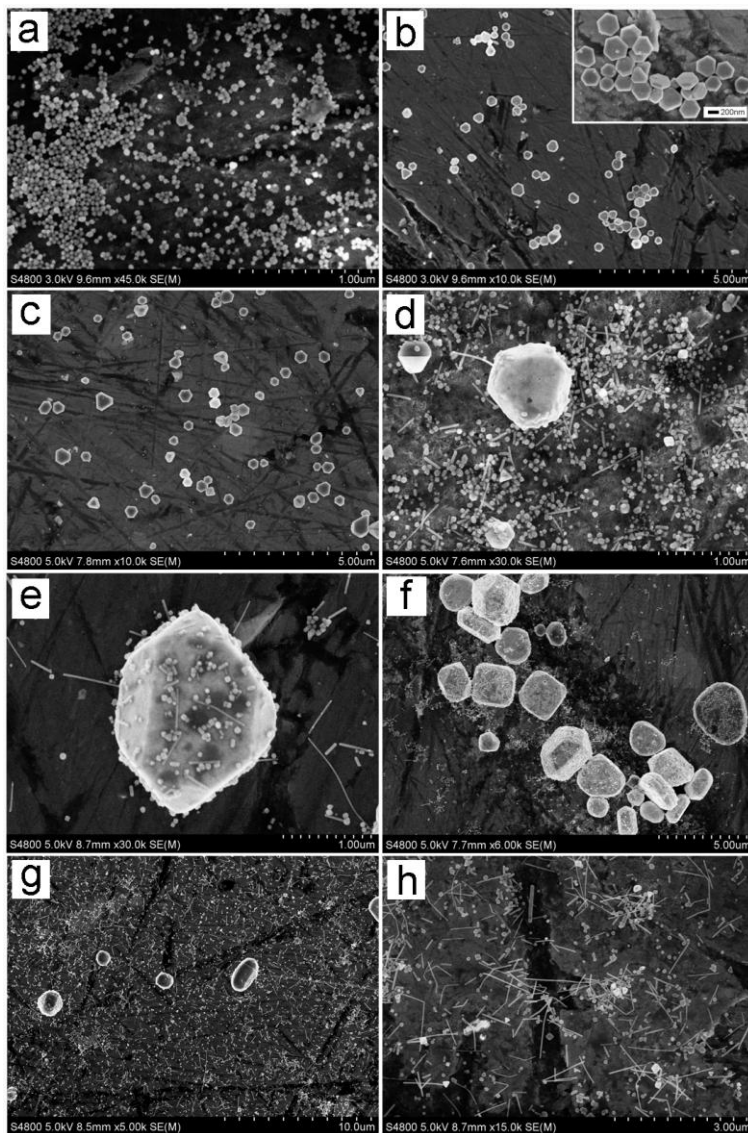

**Figure S5.** SEM images of the samples obtained by reducing AgBr at different reaction times:

(a) 0 min, (b) 20 min, (c) 40 min, (d) 90 min, (e) 120 min, (f) 180 min, (g) 240 min, (h) 300 min.

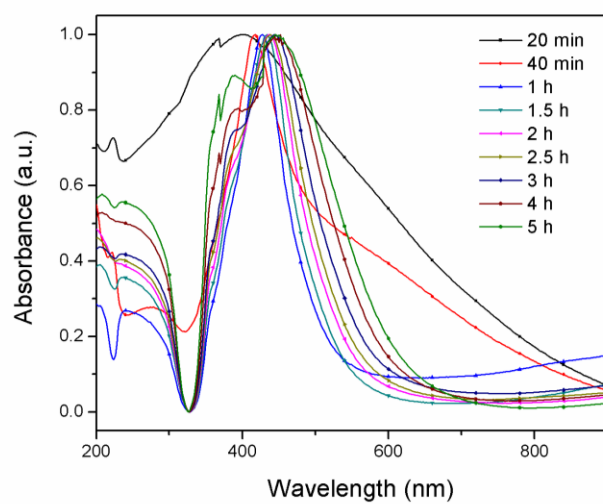

**Figure S6.** UV-visible spectra of the samples obtained from reduction of AgBr nanoplates at different reaction times.
